# Supplementary material for: Photo-antimicrobial polymeric films releasing nitric oxide with fluorescence reporting under visible light
Source: Royal Society of Chemistry journal article supplement (doi:10.1039/c6tb01388k), 2016-01-01
Supplement: c6tb01388k1.pdf [file c6tb01388k1.pdf]

**Electronic Supplementary Information**

**Photo-antimicrobial polymeric films releasing nitric oxide with  
fluorescent reporting under visible light**

Nino Marino,<sup>a</sup> Marta Perez-Lloret,<sup>a</sup> Anna R. Blanco,<sup>b</sup> Alessandro Venuta,<sup>c</sup> Fabiana Quaglia<sup>c\*</sup>  
and Salvatore Sortino<sup>a\*</sup>

<sup>a</sup>*Laboratory of Photochemistry, Department of Drug Sciences, University of Catania, I-95125 Catania, Italy.*

*E-mail: ssortino@unict.it*

<sup>b</sup>*Clinical Development, SIFI S.p.A. Via Ercole Patti 36, Lavinaio, 95020 Catania, Italy*

<sup>c</sup>*Laboratory of Drug Delivery, Department of Pharmacy, University of Napoli Federico II, I-80131 Napoli, Italy. Email: quaglia@unina.it*

---

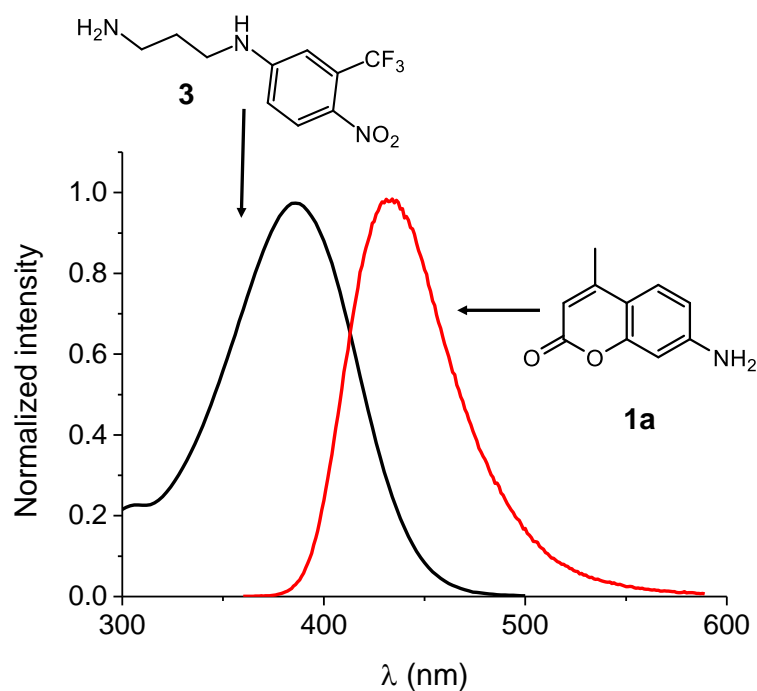

**Fig. S1.** Spectral overlap between the fluorescence emission of coumarin **1a** (red) and the absorption of the NO photoreleaser **3** (black). This latter was synthesized according to our already reported procedure.<sup>15</sup>

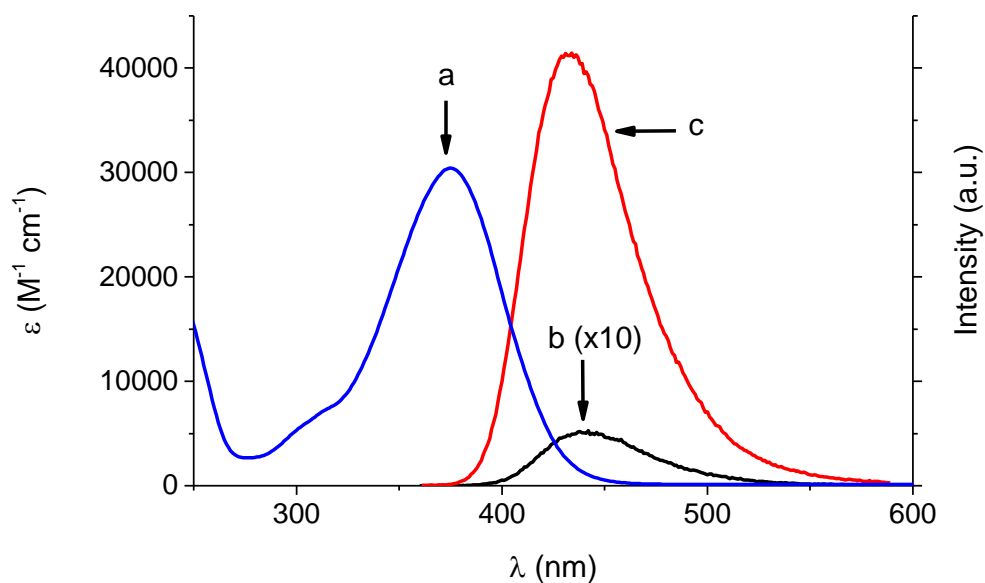

**Fig. S2.** Absorption spectrum of the molecular hybrid **1** in methanol (a) (left y axis) and fluorescence emission spectrum of optically matched methanol solutions of **1** (b) and the coumarin derivative **1a** (c) ( $\lambda_{\text{exc}} = 360$  nm) (right y axis). Spectrum b has been multiplied for 10, for a sake of clarity.

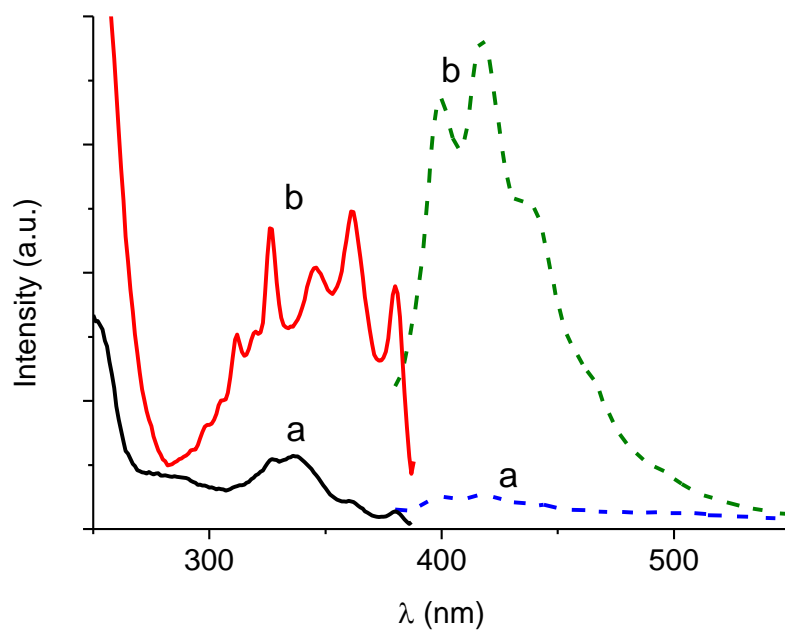

**Figure S3.** Representative fluorescence emission (dotted) and excitation (solid) spectra obtained after fluorimetric assay of non-irradiated (a) and irradiated (b) polymeric film of PLGA doped with **1** in phosphate buffer solutions 10 mM at pH 7.4. Emission spectrum at  $\lambda_{\text{exc}} = 360$  nm; excitation spectrum at  $\lambda_{\text{em}} = 410$  nm

#### Supplementary bibliography

1S. F. L. Callari and S. Sortino, *Chem. Commun.*, **2008**, 1971.
